# Supplementary material
Source: PubMed Central journal article supplement (PMC6362847)
Supplement: NIHMS1512415-supplement-1.pdf [file NIHMS1512415-supplement-1.pdf]

## Supplemental Information

### Supplemental Figure 1

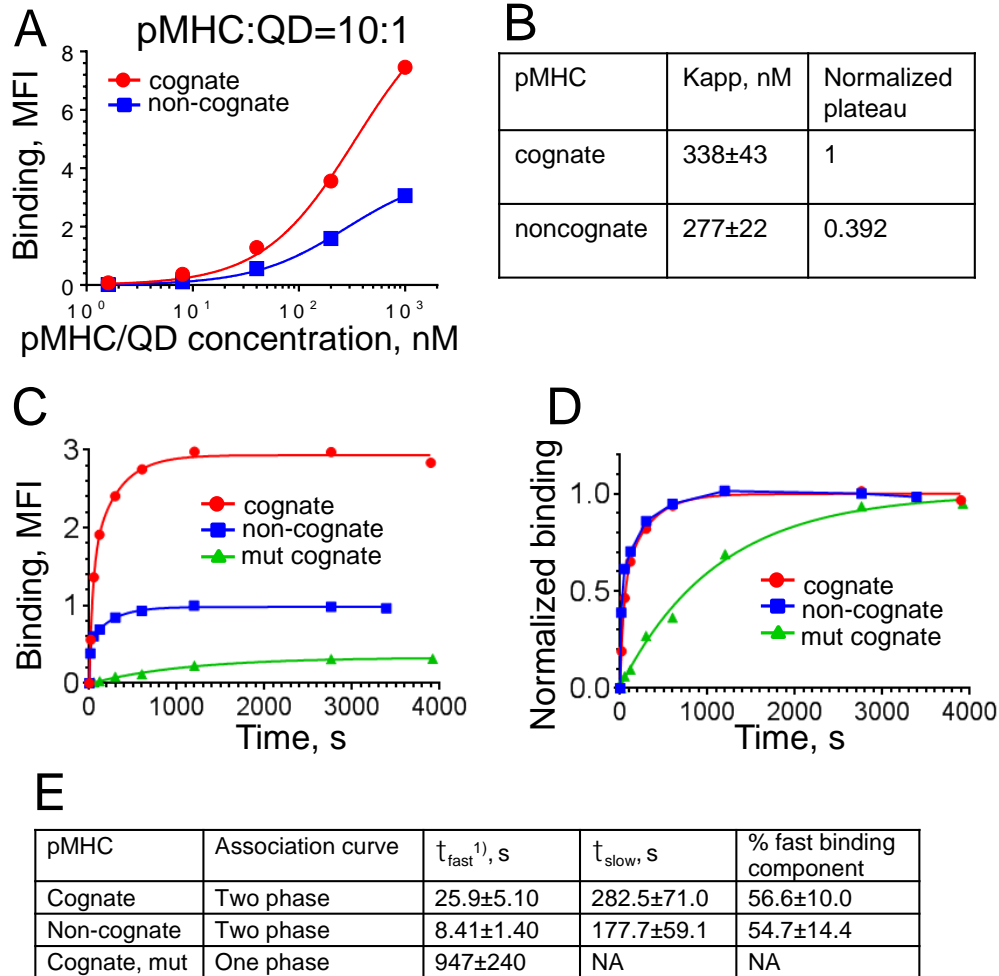

<sup>1)</sup>  $\tau$  is a time constant in equation (2); mean±SD are shown

**Supplemental Figure 1. Equilibrium and kinetics analysis of pHLA-A2/QDs interaction with CTL surface.** Representative measurements of pHLA-A2/QD equilibrium binding to CER43 cell surface at room temperature (**A**) and corresponding equilibrium binding parameters from 3 independent experiments (**B**) are shown. Representative kinetics measurements for pHLA-A2/QDs binding to 68A62 CTL surface at 18°C (**C**) and corresponding normalized binding data and fitted curves (**D**) are presented. Association kinetics parameters were derived from analysis of 3 independent experiments (**E**).

## Supplemental Figure 2

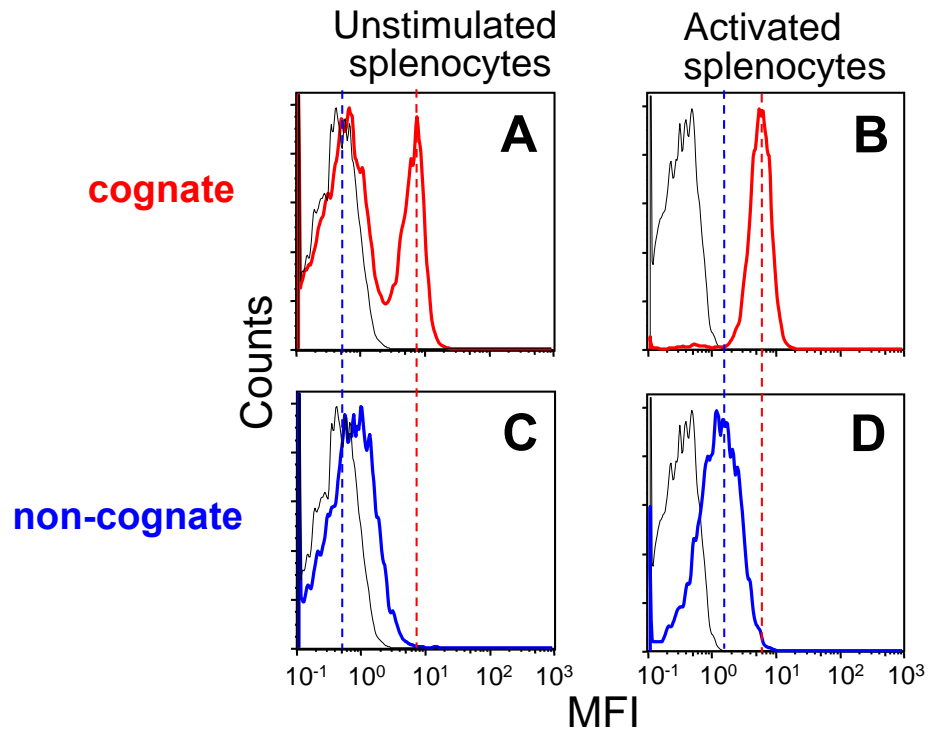

**Supplemental Figure 2. pMHC/NiNLP binding to the surface of naïve and activated 2C cells.** Splenocytes from 2C transgenic mice were activated with SIYRYGL (SIY) peptide at 1  $\mu$ M for 24 hr at 37°C. The cells were washed to remove free peptide and incubated for an additional 48 hours with 100 u/ml of IL-2. Unstimulated splenocytes (**A** and **C**) and activated splenocytes mostly containing activated 2C cells (**B** and **D**) were incubated with 10 nM of NiNLPs bearing 30 molecules of either cognate SIY-K<sup>b</sup> protein (**A** and **B**) or non-cognate pOV8-K<sup>b</sup> protein (**C** and **D**) for 30 min at room temperature. The cells were washed and analyzed by flow cytometry.

## Supplemental Table 1

**Supplemental Table 1.** Expression level of TCR and CD8 molecules on CTL surface

| CTL    | TCR           | CD8            |
|--------|---------------|----------------|
| 68A62  | 77,718±14,170 | 297,426±30,547 |
| CER-43 | 94,509±12,836 | 190,561±22,850 |

Cytotoxic lymphocytes were stained with saturation amounts of Alexa 488 labelled with mouse antibodies against human CD3 (OKT-3, purified on protein A) or CD8 alpha (BD Pharmingen, RPA-T8) in DPBS with 2% FBS for 1 hour at 4°C. The cells were briefly washed with chilled buffer and were immediately analyzed by flow cytometry. Alexa 488 calibrated beads (Quantum™ Alexa Fluor® 488 MESF, Bangs Laboratories) were suspended in the same FACS buffer and analyzed in line with fluorescently labelled cells. Cell-bound fluorescence were quantify by Bangs Laboratories quantitative template QuickCal. Number of TCR molecules calculated with assumption that two molecules of CD3 epsilon chains surrounded one  $\alpha,\beta$ -TCR molecule. Mean±SD is indicated (N=3).
